# Supplementary material
Source: Elsevier journal article supplement (https://www.sciencedirect.com/science/article/pii/S2530016418300090)
Supplement: mmc1 [file S2530016418300090:mmc1.pdf]

**Tabla e-1. Coeficientes de correlación ítem/total para cada una de los ítems de las tres subescalas y el  $\alpha$  de Cronbach del cuestionario si se elimina el elemento**  
**Subescala 1. Preocupación ( $\alpha$  de Cronbach 0,939)**

|                                                                                                                                                                 | M    | DE   | Rango | Correlación ítem/total | $\alpha$ de Cronbach si se elimina el ítem |
|-----------------------------------------------------------------------------------------------------------------------------------------------------------------|------|------|-------|------------------------|--------------------------------------------|
| 1. Le preocupa no darse cuenta que está teniendo una bajada de glucosa                                                                                          | 3,81 | 1,27 | 1-5   | 0,690                  | 0,934                                      |
| 2. Le preocupa no llevar consigo comida, fruta o zumo ante una posible bajada de glucosa                                                                        | 3,98 | 1,17 | 1-5   | 0,616                  | 0,936                                      |
| 3. Le preocupa estar mareado o desmayarse en público si tiene bajada de glucosa                                                                                 | 3,5  | 1,54 | 1-5   | 0,693                  | 0,934                                      |
| 4. Le preocupa tener una bajada de glucosa mientras duerme                                                                                                      | 3,91 | 1,21 | 1-5   | 0,656                  | 0,935                                      |
| 5. Le preocupa que ante una bajada de glucosa lo pase mal estando con sus amigos o su familia                                                                   | 2,99 | 1,49 | 1-5   | 0,660                  | 0,935                                      |
| 6. Le preocupa quedarse solo si tiene una bajada de glucosa                                                                                                     | 2,72 | 1,48 | 1-5   | 0,623                  | 0,935                                      |
| 7. Le preocupa hacer el ridículo o parecer borracho si tiene una bajada de glucosa                                                                              | 2,09 | 1,47 | 1-5   | 0,53                   | 0,938                                      |
| 8. Le preocupa perder el control si tiene una bajada de glucosa                                                                                                 | 3,4  | 1,53 | 1-5   | 0,665                  | 0,935                                      |
| 9. Le preocupa que no haya nadie que pueda ayudarle durante una bajada de glucosa                                                                               | 3,36 | 1,4  | 1-5   | 0,675                  | 0,934                                      |
| 10. Le preocupa tener una bajada de glucosa mientras conduce                                                                                                    | 3,74 | 1,39 | 1-5   | 0,64                   | 0,935                                      |
| 11. Le preocupa cometer errores o tener accidentes en el trabajo ante una bajada de glucosa                                                                     | 3,51 | 1,54 | 1-5   | 0,777                  | 0,932                                      |
| 12. Le preocupa que le valoren mal en el trabajo a causa de una bajada de glucosa                                                                               | 2,98 | 1,68 | 1-5   | 0,66                   | 0,935                                      |
| 13. Le preocupa tener convulsiones ante una bajada de glucosa                                                                                                   | 3,36 | 1,64 | 1-5   | 0,701                  | 0,934                                      |
| 14. Le preocupa tener dificultad para pensar claramente cuando tiene responsabilidades con otras personas (niños, gente mayor, etc.) ante una bajada de glucosa | 3,83 | 1,32 | 1-5   | 0,745                  | 0,933                                      |
| 15. Le preocupa desarrollar complicaciones a largo plazo por tener demasiadas bajadas de glucosa                                                                | 3,81 | 1,28 | 1-5   | 0,614                  | 0,936                                      |
| 16. Le preocupa estar mareado o desmayado ante una bajada de glucosa                                                                                            | 3,84 | 1,33 | 1-5   | 0,732                  | 0,933                                      |
| 17. Le preocupa tener bajadas de glucosa por la insulina                                                                                                        | 3,67 | 1,25 | 1-5   | 0,667                  | 0,935                                      |
| <b>Subescala 2. Comportamiento asociado a evitación (<math>\alpha</math> de Cronbach 0,6)</b>                                                                   |      |      |       |                        |                                            |
| 18. Reduce su medicación (insulina/pastillas) cuando piensa que su glucosa está demasiado                                                                       | 3,78 | 1,35 | 1-5   | 0,399                  | 0,503                                      |

|                                                                                                                |      |      |     |       |       |
|----------------------------------------------------------------------------------------------------------------|------|------|-----|-------|-------|
| baja                                                                                                           |      |      |     |       |       |
| 19. Lleva siempre consigo algo de azúcares para que le suba el nivel de glucosa rápidamente                    | 4,49 | 1,08 | 1-5 | 0,351 | 0,543 |
| 20. Evita el ejercicio cuando su nivel de glucosa es bajo                                                      | 3,99 | 1,37 | 1-5 | 0,338 | 0,556 |
| 21. Comprueba su nivel de glucosa a menudo cuando tiene prevista una reunión larga o va a estar en una fiesta. | 3,92 | 1,2  | 1-5 | 0,422 | 0,487 |
| <b>Subescala 3. Comportamiento que produce hiperglucemia (<math>\alpha</math> de Cronbach 0,728)</b>           |      |      |     |       |       |
| 22. Intenta mantener un nivel de glucosa alta como medida de seguridad para evitar una bajada de azúcar.       | 2,3  | 1,23 | 1-5 | 0,635 | 0,507 |
| 23. Intenta mantener su nivel de glucosa un poco alto cuando se va quedar un rato solo                         | 1,5  | 0,91 | 1-5 | 0,486 | 0,708 |
| 24. Mantiene su nivel de glucosa alto cuando haces planes cómo estar en una reunión más tiempo o en una fiesta | 2,59 | 1,35 | 1-5 | 0,543 | 0,646 |

**Tabla e-2. Componentes de la estructura factorial del cuestionario.**

| Ítems                                                                                                                                                           | Análisis factorial de los ítems |              |              |
|-----------------------------------------------------------------------------------------------------------------------------------------------------------------|---------------------------------|--------------|--------------|
|                                                                                                                                                                 | Componente 1                    | Componente 2 | Componente 3 |
| 1. Le preocupa no darse cuenta que está teniendo una bajada de glucosa                                                                                          | 0,728                           |              |              |
| 2. Le preocupa no llevar consigo comida, fruta o zumo ante una posible bajada de glucosa                                                                        | 0,611                           |              |              |
| 3. Le preocupa estar mareado o desmayarse en público si tiene bajada de glucosa                                                                                 | 0,709                           |              |              |
| 4. Le preocupa tener una bajada de glucosa mientras duerme                                                                                                      | 0,707                           |              |              |
| 5. Le preocupa que ante una bajada de glucosa lo pase mal estando con sus amigos o su familia                                                                   | 0,662                           |              |              |
| 6. Le preocupa quedarse solo si tiene una bajada de glucosa                                                                                                     | 0,498                           |              | 0,317        |
| 7. Le preocupa hacer el ridículo o parecer borracho si tiene una bajada de glucosa                                                                              | 0,464                           |              | 0,392        |
| 8. Le preocupa perder el control si tiene una bajada de glucosa                                                                                                 | 0,621                           |              |              |
| 9. Le preocupa que no haya nadie que pueda ayudarle durante una bajada de glucosa                                                                               | 0,538                           |              | 0,338        |
| 10. Le preocupa tener una bajada de glucosa mientras conduce                                                                                                    | 0,635                           |              |              |
| 11. Le preocupa cometer errores o tener accidentes en el trabajo ante una bajada de glucosa                                                                     | 0,831                           |              |              |
| 12. Le preocupa que le valoren mal en el trabajo a causa de una bajada de glucosa                                                                               | 0,758                           |              |              |
| 13. Le preocupa tener convulsiones ante una bajada de glucosa                                                                                                   | 0,768                           |              |              |
| 14. Le preocupa tener dificultad para pensar claramente cuando tiene responsabilidades con otras personas (niños, gente mayor, etc.) ante una bajada de glucosa | 0,767                           |              |              |
| 15. Le preocupa desarrollar complicaciones a largo plazo por tener demasiadas bajadas de glucosa                                                                | 0,735                           |              |              |
| 16. Le preocupa estar mareado o desmayado ante una bajada de glucosa                                                                                            | 0,82                            |              |              |
| 17. Le preocupa tener bajadas de glucosa por la insulina                                                                                                        | 0,701                           |              |              |
| 18. Reduce su medicación (insulina/pastillas) cuando piensa que su glucosa está demasiado baja                                                                  |                                 | 0,616        |              |
| 19. Lleva siempre consigo algo de azúcares para que le suba el nivel de glucosa rápidamente                                                                     |                                 | 0,486        |              |
| 20. Evita el ejercicio cuando su nivel de glucosa es bajo                                                                                                       |                                 | 0,438        |              |
| 21. Comprueba su nivel de glucosa a menudo cuando tiene prevista una reunión larga o va a estar en una fiesta.                                                  |                                 | 0,499        |              |
| 22. Intenta mantener un nivel de glucosa alta como                                                                                                              |                                 |              | 0,722        |

---

|                                                                                                                                                                                    |       |
|------------------------------------------------------------------------------------------------------------------------------------------------------------------------------------|-------|
| medida de seguridad para evitar una bajada de azúcar.                                                                                                                              |       |
| 23. Intenta mantener su nivel de glucosa un poco alto cuando se va quedar un rato solo                                                                                             | 0,529 |
| 24. Mantiene su nivel de glucosa alto cuando haces planes cómo estar en una reunión más tiempo o en una fiesta                                                                     | 0,832 |
| Análisis factorial del cuestionario muestra modelo de tres componentes tras método de rotación por el método Oblimin directo. Sólo se muestran las que tienen peso factorial >0,3. |       |

---
